# Supplementary material for: Microbiome analysis of Pacific white shrimp gut and rearing water from Malaysia and Vietnam: implications for aquaculture research and management
Source: PeerJ. 2018 Oct 30;6:e5826. doi: 10.7717/peerj.5826 (PMC6214229; doi:10.7717/peerj.5826)
Supplement: Data S5 [file peerj-06-5826-s010.xlsx]

## Sheet: Sheet1
Group	Total	Shared Microbial Family
Malaysian Farm |Malaysian Shrimp |Vietnamese Farm |Vietnamese Shrimp	6	Planctomycetaceae
		Alcaligenaceae
		Flavobacteriaceae
		Microbacteriaceae
		Acidimicrobiaceae
		Rhodobacteraceae
Malaysian Farm |Malaysian Shrimp| Vietnamese Farm	2	Verrucomicrobiaceae
		Family_II
Malaysian Shrimp |Vietnamese Farm| Vietnamese Shrimp	1	Vibrionaceae
Malaysian Farm |Malaysian Shrimp	1	Nitriliruptoraceae
Malaysian Farm |Vietnamese Farm	4	Cryomorphaceae
		Rhodospirillaceae
		Bacteriovoracaceae
		Saprospiraceae
Vietnamese Farm |Vietnamese Shrimp	1	Phyllobacteriaceae
Malaysian Shrimp	3	Fusobacteriaceae
		Caldilineaceae
		Spartobacteria_genera_incertae_sedis
Malaysian Farm	7	SAR11
		Oceanospirillales_incertae_sedis
		Chitinophagaceae
		Phycisphaeraceae
		Trueperaceae
		Rhodothermaceae
		Cyanobiaceae
Vietnamese Farm	10	Cytophagaceae
		Chromatiaceae
		Cyclobacteriaceae
		Saccharibacteria_genera_incertae_sedis
		Caldilineaceae
		Hyphomonadaceae
		Comamonadaceae
		Parcubacteria_genera_incertae_sedis
		Alteromonadaceae
		Opitutaceae
Vietnamese Shrimp	2	Erythrobacteraceae
		Demequinaceae
