# Supplementary material for: Microbiome analysis of Pacific white shrimp gut and rearing water from Malaysia and Vietnam: implications for aquaculture research and management
Source: PeerJ. 2018 Oct 30;6:e5826. doi: 10.7717/peerj.5826 (PMC6214229; doi:10.7717/peerj.5826)
Supplement: Table S1 [file peerj-06-5826-s001.xlsx]

## Sheet: Sheet1
#SampleID	Pond ID	Country	Source	Host	Country_Source	Country_Source_Location	Notes
A0A3A	A0A3	Vietnam	rearing water		VF	VF_A0A3
A0A3B	A0A3	Vietnam	rearing water		VF	VF_A0A3
A0A3C	A0A3	Vietnam	rearing water		VF	VF_A0A3
A0A3D	A0A3	Vietnam	rearing water		VF	VF_A0A3
A0B2A	A0B2	Vietnam	rearing water		VF	VF_A0B2
A0B2B	A0B2	Vietnam	rearing water		VF	VF_A0B2
A0B2D	A0B2	Vietnam	rearing water		VF	VF_A0B2
A0B3A	A0B3	Vietnam	rearing water		VF	VF_A0B3
A0B3B	A0B3	Vietnam	rearing water		VF	VF_A0B3
A0B3C	A0B3	Vietnam	rearing water		VF	VF_A0B3
A0B3D	A0B3	Vietnam	rearing water		VF	VF_A0B3
FAM1	VNFarmF	Vietnam	rearing water		VF	VF_VNFarmF
FAM2	VNFarmF	Vietnam	rearing water		VF	VF_VNFarmF
FAM3	VNFarmF	Vietnam	rearing water		VF	VF_VNFarmF
FAM4	VNFarmF	Vietnam	rearing water		VF	VF_VNFarmF
A0A2A	A0A2	Vietnam	rearing water		VF	VF_A0A2
A0A2B	A0A2	Vietnam	rearing water		VF	VF_A0A2
A0A2C	A0A2	Vietnam	rearing water		VF	VF_A0A2
KY1A	Pond1	Malaysia	rearing water		MF	MF_Pond1
KY1B	Pond1	Malaysia	rearing water		MF	MF_Pond1
KY1C	Pond1	Malaysia	rearing water		MF	MF_Pond1
KY5A	Pond5	Malaysia	rearing water		MF	MF_Pond5
KY5B	Pond5	Malaysia	rearing water		MF	MF_Pond5
KY5C	Pond5	Malaysia	rearing water		MF	MF_Pond5
KY6A	Pond6	Malaysia	rearing water		MF	MF_Pond6
KY6B	Pond6	Malaysia	rearing water		MF	MF_Pond6
KY6C	Pond6	Malaysia	rearing water		MF	MF_Pond6
KY7A	Pond7	Malaysia	rearing water		MF	MF_Pond7
KY7B	Pond7	Malaysia	rearing water		MF	MF_Pond7
KY7C	Pond7	Malaysia	rearing water		MF	MF_Pond7
KY9A	Pond9	Malaysia	rearing water		MF	MF_Pond9
KY9B	Pond9	Malaysia	rearing water		MF	MF_Pond9
KY9C	Pond9	Malaysia	rearing water		MF	MF_Pond9
KY10A	Pond10	Malaysia	rearing water		MF	MF_Pond10
KY10B	Pond10	Malaysia	rearing water		MF	MF_Pond10
KY10C	Pond10	Malaysia	rearing water		MF	MF_Pond10
KY12A	Pond12	Malaysia	rearing water		MF	MF_Pond12
KY12B	Pond12	Malaysia	rearing water		MF	MF_Pond12
KY12C	Pond12	Malaysia	rearing water		MF	MF_Pond12
KY13A	Pond13	Malaysia	rearing water		MF	MF_Pond13
KY13B	Pond13	Malaysia	rearing water		MF	MF_Pond13
KY13C	Pond13	Malaysia	rearing water		MF	MF_Pond13
KY11A	Pond11	Malaysia	rearing water		MF	MF_Pond11	Mussel infestation
KY11C	Pond11	Malaysia	rearing water		MF	MF_Pond11	Mussel infestation
F1S2	VNFarmF	Vietnam	shrimp intestine	Litopenaeus vannamei	VS	VF_VNFarmS
F2S1	VNFarmF	Vietnam	shrimp intestine	Litopenaeus vannamei	VS	VF_VNFarmS
F2S2	VNFarmF	Vietnam	shrimp intestine	Litopenaeus vannamei	VS	VF_VNFarmS
F2S3	VNFarmF	Vietnam	shrimp intestine	Litopenaeus vannamei	VS	VF_VNFarmS
S1PA	A0A3	Vietnam	shrimp intestine	Litopenaeus vannamei	VS	VS_A0A3
S1PB	A0B3	Vietnam	shrimp intestine	Litopenaeus vannamei	VS	VS_A0B3
S2PA	A0A3	Vietnam	shrimp intestine	Litopenaeus vannamei	VS	VS_A0A3
S2PB	A0B3	Vietnam	shrimp intestine	Litopenaeus vannamei	VS	VS_A0B3
S3PA	A0A3	Vietnam	shrimp intestine	Litopenaeus vannamei	VS	VS_A0A3
S3PB	A0B3	Vietnam	shrimp intestine	Litopenaeus vannamei	VS	VS_A0B3
KYP1	Unknown	Malaysia	shrimp intestine	Litopenaeus vannamei	MS	MS
KYP2	Unknown	Malaysia	shrimp intestine	Litopenaeus vannamei	MS	MS
KYP3	Unknown	Malaysia	shrimp intestine	Litopenaeus vannamei	MS	MS
KYP4	Unknown	Malaysia	shrimp intestine	Litopenaeus vannamei	MS	MS
KYP5	Unknown	Malaysia	shrimp intestine	Litopenaeus vannamei	MS	MS
KYP6	Unknown	Malaysia	shrimp intestine	Litopenaeus vannamei	MS	MS
KYP7	Unknown	Malaysia	shrimp intestine	Litopenaeus vannamei	MS	MS
KYP8	Unknown	Malaysia	shrimp intestine	Litopenaeus vannamei	MS	MS
KYP9	Unknown	Malaysia	shrimp intestine	Litopenaeus vannamei	MS	MS
KYP10	Unknown	Malaysia	shrimp intestine	Litopenaeus vannamei	MS	MS
KYVPP1	Unknown	Malaysia	shrimp intestine	Litopenaeus vannamei	MS	MS_SD
KYPP2	Unknown	Malaysia	shrimp intestine	Litopenaeus vannamei	MS	MS_SD
KYPP3	Unknown	Malaysia	shrimp intestine	Litopenaeus vannamei	MS	MS_SD
KYBD3	Unknown	Malaysia	shrimp intestine	Litopenaeus vannamei	MS	MS_SD
