# Supplementary material for: Microbiome analysis of Pacific white shrimp gut and rearing water from Malaysia and Vietnam: implications for aquaculture research and management
Source: PeerJ. 2018 Oct 30;6:e5826. doi: 10.7717/peerj.5826 (PMC6214229; doi:10.7717/peerj.5826)
Supplement: Table S2 [file peerj-06-5826-s002.xlsx]

## Sheet: Sheet1
	Weighted Unifrac		Unweighted Unifrac
Group 1	method name	ANOSIM	method name	ANOSIM
Malaysian Shrimp	test statistic name	R	test statistic name	R
	sample size	24	sample size	24
Group 2	number of groups	2	number of groups	2
Vietnamese Shrimp	test statistic	0.519958	test statistic	0.679097
	p-value	0.001	p-value	0.001
Group 1	method name	ANOSIM	method name	ANOSIM
Malaysian Shrimp Rearing Water	test statistic name	R	test statistic name	R
	sample size	44	sample size	44
Group 2	number of groups	2	number of groups	2
Vietnamese Shrimp Rearing Water	test statistic	0.890748	test statistic	0.997953
	p-value	0.001	p-value	0.001
	number of permutations	999	number of permutations	999
Group 1	method name	ANOSIM	method name	ANOSIM
Malaysian Shrimp	test statistic name	R	test statistic name	R
	sample size	40	sample size	40
Group 2	number of groups	2	number of groups	2
Malaysian Shrimp Rearing Water	test statistic	0.937672	test statistic	0.970414
	p-value	0.001	p-value	0.001
	number of permutations	999	number of permutations	999
Group 1	method name	ANOSIM	method name	ANOSIM
Vietnamese Shrimp	test statistic name	R	test statistic name	R
	sample size	28	sample size	28
Group 2	number of groups	2	number of groups	2
Vietnamese Shrimp Rearing Water	test statistic	0.676712	test statistic	0.743659
	p-value	0.001	p-value	0.001
	number of permutations	999	number of permutations	999
